# Supplementary material for: The influence of single-point mutation D614G on the binding process between human angiotensin-converting enzyme 2 and the SARS-CoV-2 spike protein-an atomistic simulation study
Source: Royal Society of Chemistry journal article supplement (doi:10.1039/d3ra00198a), 2023-01-01
Supplement: d3ra00198a1.pdf [file d3ra00198a1.pdf]

## Supplementary information

### **The Influence of Single-Point Mutation D614G on the Binding Process Between Human Angiotensin-Converting Enzyme 2 and the SARS-CoV-2 Spike Protein- An Atomistic Simulation Study**

*Chengcheng Shi,<sup>b</sup> Yanqi Jiao,<sup>a</sup> Chao Yang<sup>b,\*</sup> and Yao Sun<sup>a,\*</sup>*

*<sup>a</sup> School of Science, Harbin Institute of Technology (Shenzhen), Shenzhen 518055, China.*

*<sup>b</sup> State Key Lab of Urban Water Resource and Environment, School of Science, Harbin Institute of Technology (Shenzhen), Shenzhen 518055, China.*

\*) Corresponding authors:

Dr. Yao Sun ([sunyao0819@hit.edu.cn](mailto:sunyao0819@hit.edu.cn))

Dr. Chao Yang ([xyyang@hit.edu.cn](mailto:xyyang@hit.edu.cn))

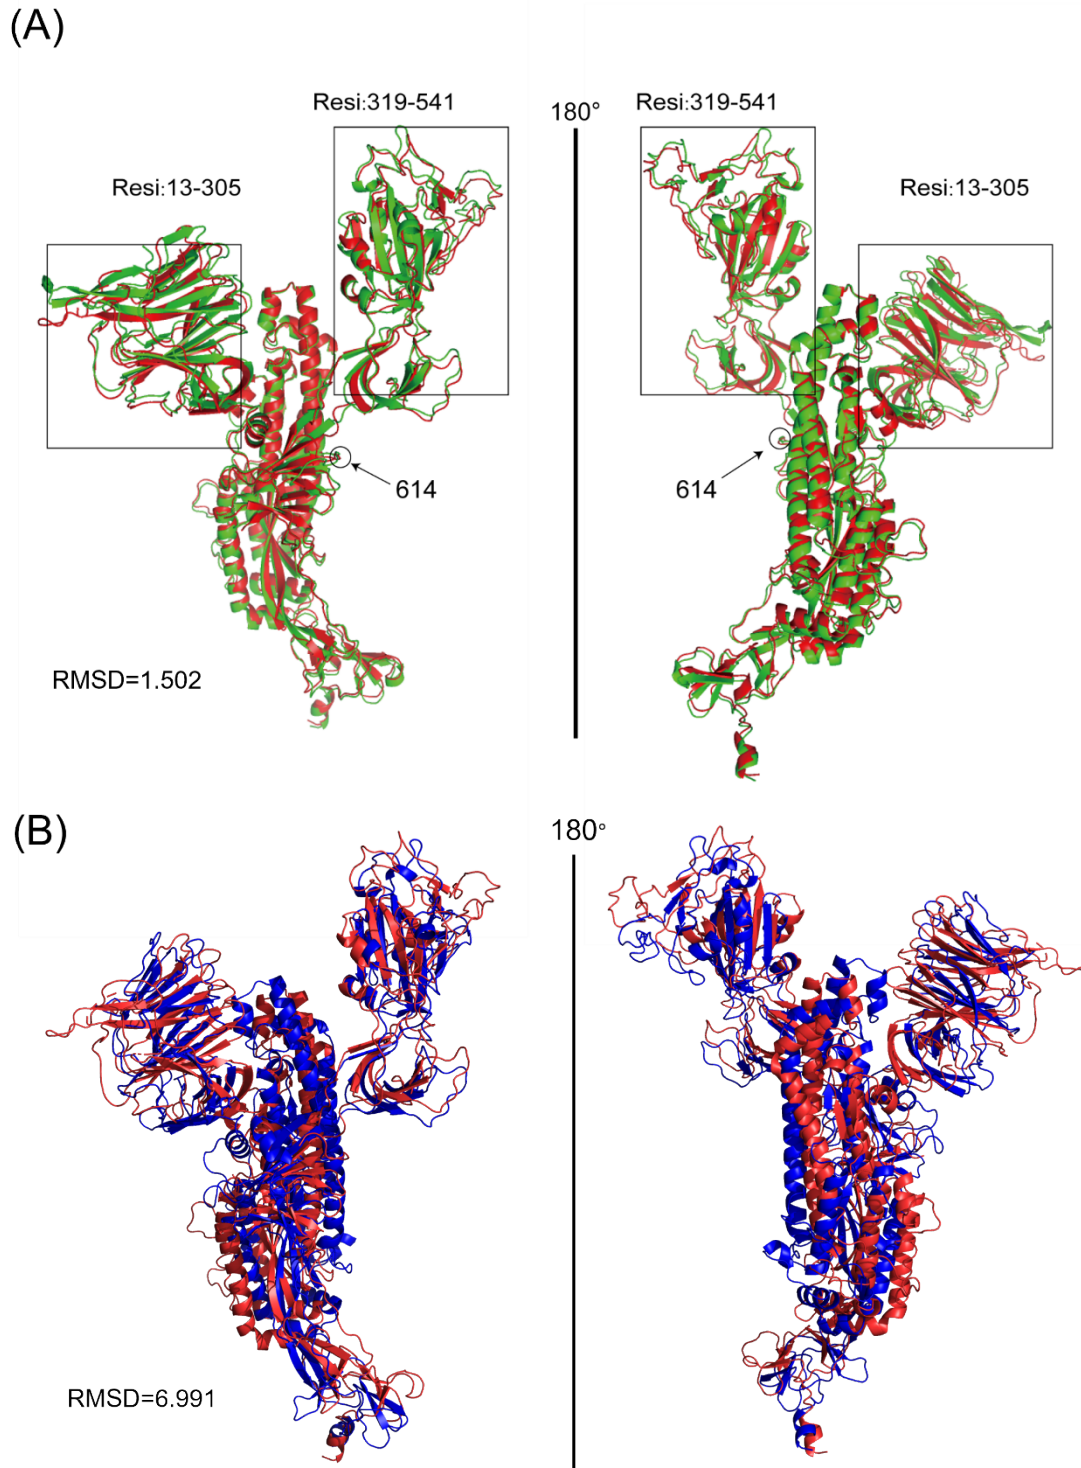

**Figure S1.** (A) The predicted single-chain (B chain) structural model of D614G mutant spike by AlphaFold2 which has the overall quality factor of 87.525 compared with the WT spike model (PDB ID :7DF4, B chain). The WT spike is colored in red while the predicted structure is colored in green. (B) The single-chain (B chain) structural model of D614G mutant spike by homologous modelling which has the overall quality factor of 62.332 compared with the WT spike model (B chain). The WT spike is colored in red while the homologous modelling is colored in green.



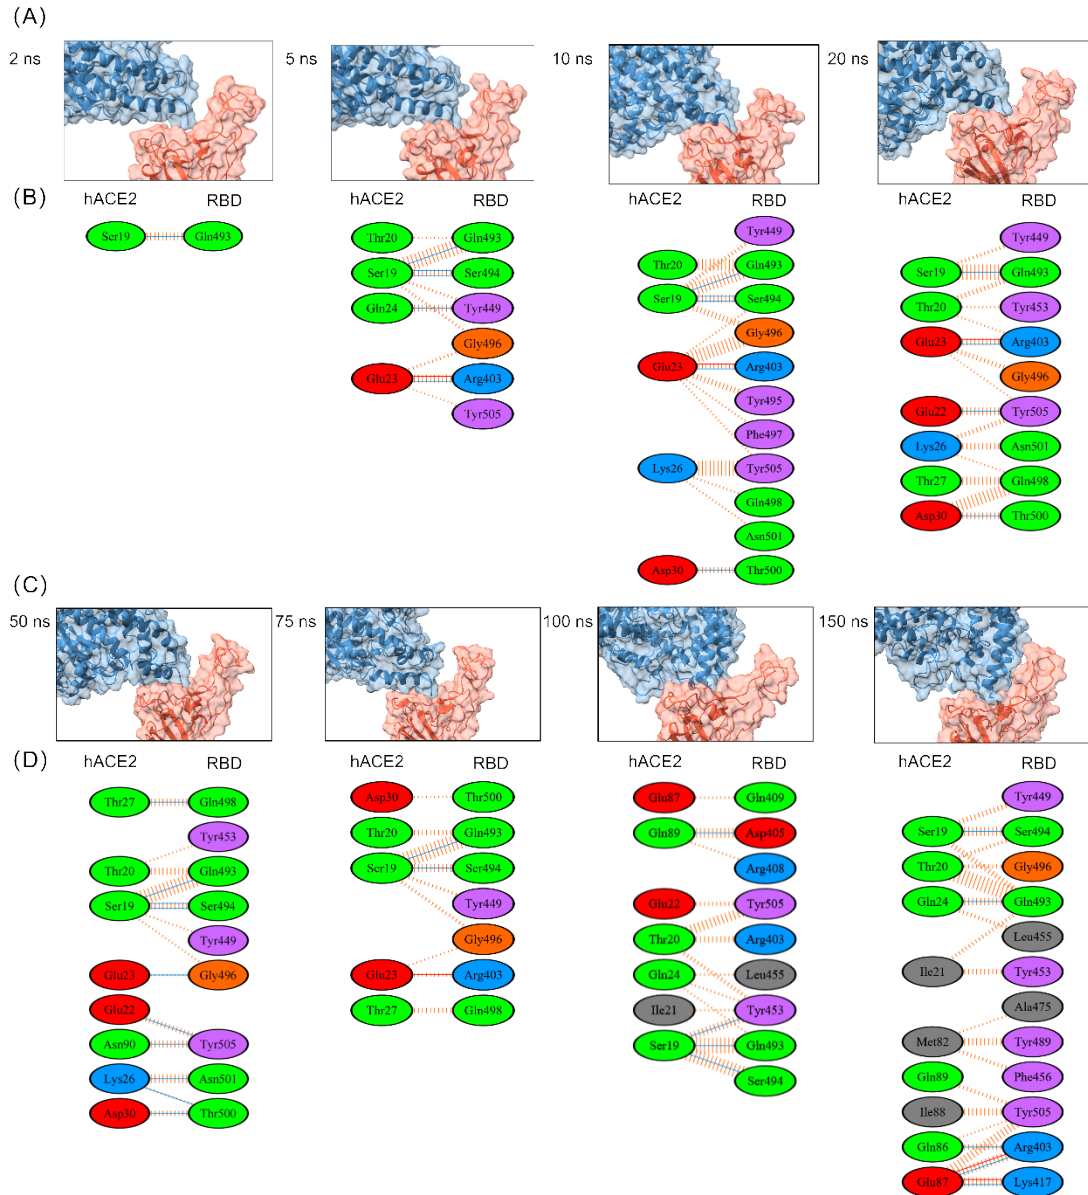

**Figure S3.** Binding process of the D614G mutant spike with hACE2 at 2 ns, 5ns, 10 ns, 20 ns, 50 ns, 75ns, 100 ns, 150 ns, (A) and (C) The binding interface, hACE2 is colored in steel blue and RBD is colored in red. (B) and (D) The interaction representation, which includes hydrogen ( — ), salt bridges ( — ), and non-bonded ( — ) interactions. The A chain represents hACE2 and B chain represents WT RBD. Residue colors: positive (blue): H, K, R; negative (red): D, E; neutral (green): S, T, N, Q; aliphatic (grey): A, V, L, I, M; aromatic (purple): F, Y, W; Pro & Gly (orange): P, G.

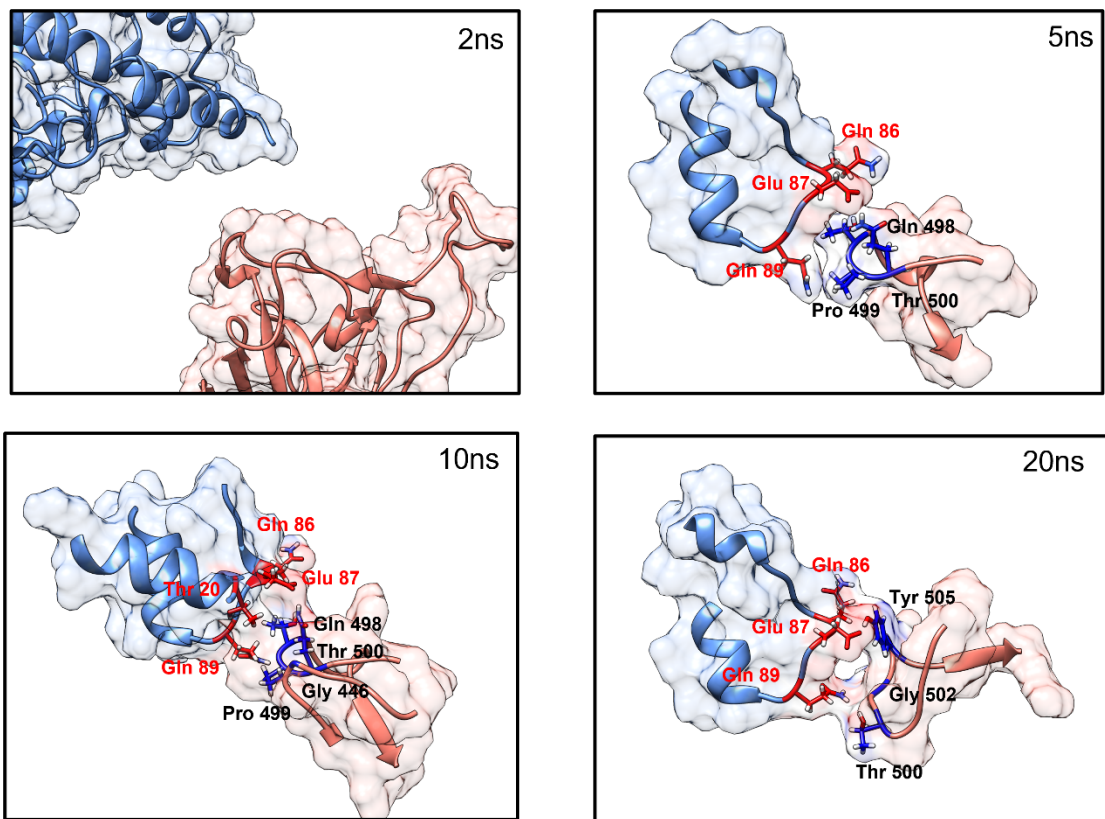

**Figure S4.** Binding process of B chain of the SARS-CoV-2 WT spike with hACE2 at 2 ns, 5 ns, 10 ns and 20 ns. The spike B chain and hACE2 are colored in pink and steel blue respectively.

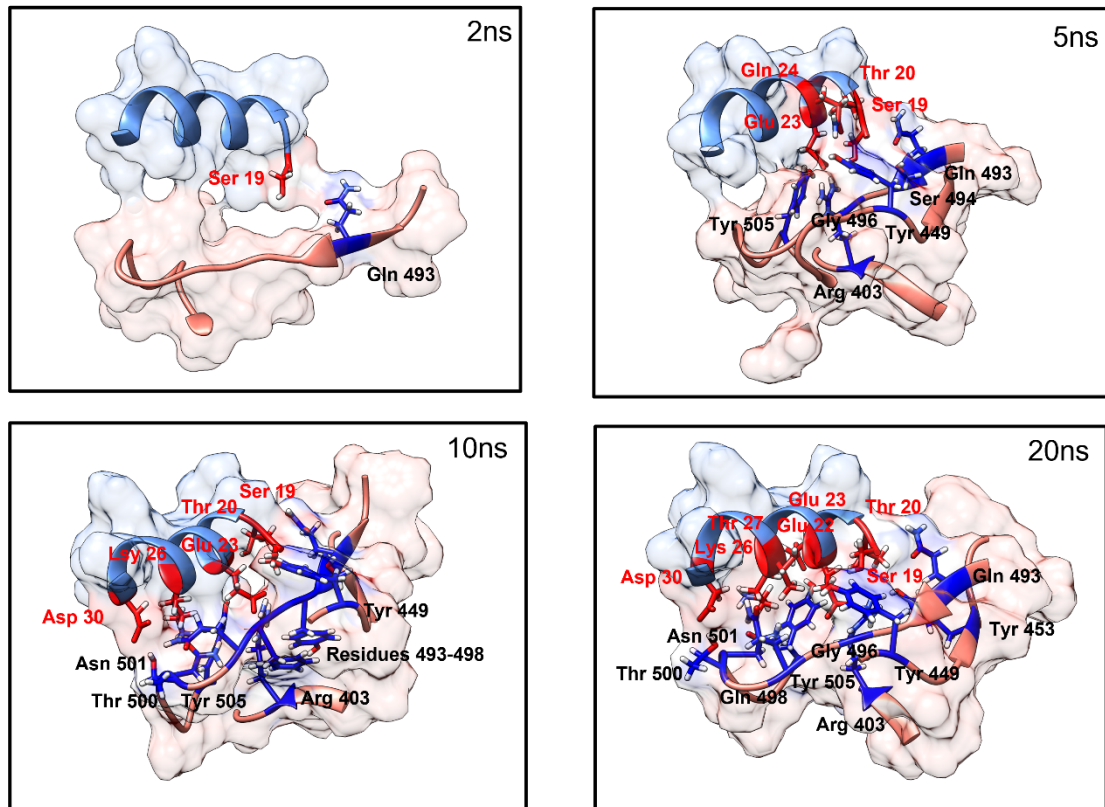

**Figure S5.** Binding process of B chain of the SARS-CoV-2 D614G mutant spike with hACE2 at 2 ns, 5 ns, 10 ns and 20 ns. The spike B chain and hACE2 are colored in pink and steel blue respectively.

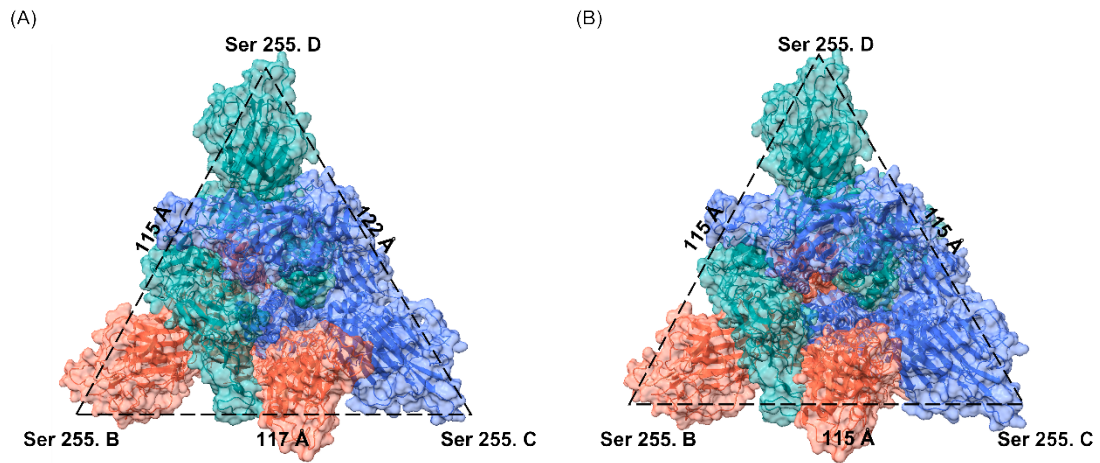

**Figure S6.** The architecture of the SARS-CoV-2 WT and D614G mutant spikes before the MD simulation, the spike chain B, chain C and chain D are colored in red, blue and cyan respectively. (A) top views of the WT spike, (B) top views of the D614G mutant spike.

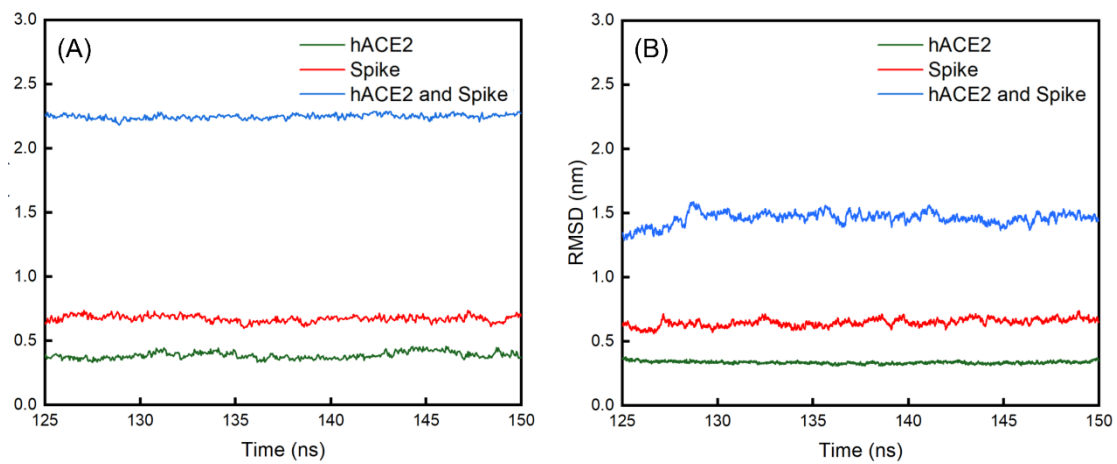

**Figure S7.** RMSD curves of the (a) WT spike, hACE2 and their complex and (b) D614G mutant spike, hACE2 and their complex for the last 25 ns of 150 ns simulations.



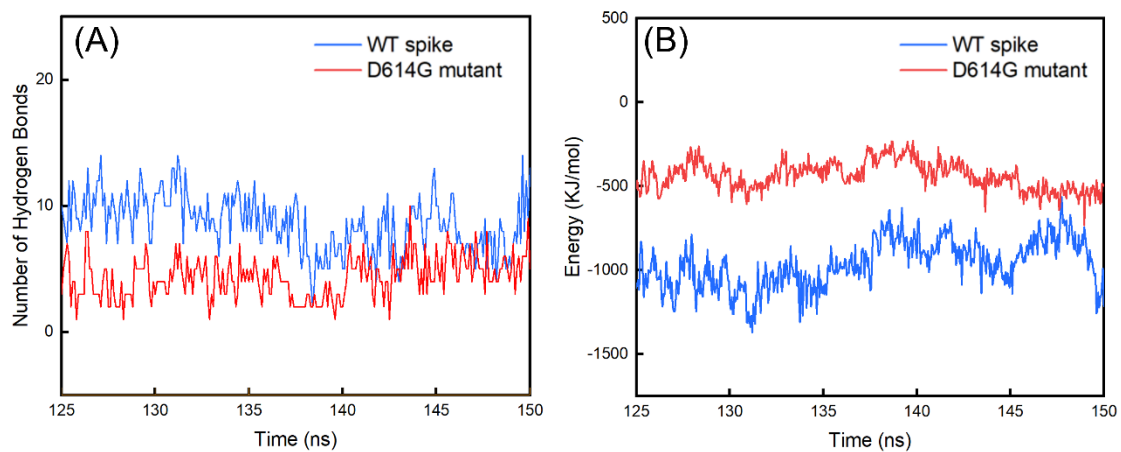

**Figure S8.** (a) Number of hydrogen bonds and (b) interaction energy between the spikes and hACE2 for the last 25 ns of the 150 ns simulations.

**Table S1.** Names and abbreviations of amino acids.

| <b>Full name</b> | <b>Three-letter<br/>abbreviation</b> | <b>One-letter<br/>abbreviation</b> |
|------------------|--------------------------------------|------------------------------------|
| Glycine          | Gly                                  | G                                  |
| Alanine          | Ala                                  | A                                  |
| Arginine         | Arg                                  | R                                  |
| Proline          | Pro                                  | P                                  |
| Serine           | Ser                                  | S                                  |
| Glutamine        | Gln                                  | Q                                  |
| Lysine           | Lys                                  | K                                  |
| Aspartic acid    | Asp                                  | D                                  |
| Glutamic acid    | Glu                                  | E                                  |
| Asparagine       | Asn                                  | N                                  |
| Threonine        | Thr                                  | T                                  |
| Valine           | Val                                  | V                                  |
| Isoleucine       | Ile                                  | I                                  |
| Leucine          | Leu                                  | L                                  |

**Table S2.** Distances between residue centers of interaction of hACE2 and WT spike after the 150 ns MD simulation.

| Residue of hACE2 | Residue of WT spike | Distance between residue centers (nm) |
|------------------|---------------------|---------------------------------------|
| Ser 19           | Val 445             | 0.82708                               |
| Ser 19           | Gly 446             | 0.72278                               |
| Ser 19           | Gly 447             | 0.57547                               |
| Ser 19           | Asn 448             | 0.60052                               |
| Ser 19           | Tyr 449             | 0.59088                               |
| Ser 19           | Ser 494             | 0.93896                               |
| Ser 19           | Gly 496             | 0.84079                               |
| Thr 20           | Gly 446             | 0.90055                               |
| Thr 20           | Gly 447             | 0.76058                               |
| Thr 20           | Gly 496             | 0.70315                               |
| Gln 24           | Ser 494             | 0.96276                               |
| Glu 75           | Phe 486             | 0.93780                               |
| Thr 78           | Phe 486             | 0.79174                               |
| Thr 78           | Asn 487             | 0.55766                               |
| Leu 79           | Gly 485             | 0.84086                               |
| Leu 79           | Phe 486             | 0.65684                               |
| Gln 81           | Tyr 489             | 0.97779                               |
| Met 82           | Leu 455             | 1.08876                               |
| Met 82           | Phe 456             | 1.09066                               |
| Met 82           | Tyr 489             | 0.89058                               |
| Pro 84           | Tyr 453             | 0.98433                               |
| Pro 84           | Leu 455             | 0.84575                               |
| Glu 87           | Arg 403             | 1.06902                               |
| Glu 87           | Tyr 495             | 1.09359                               |
| Glu 87           | Gly 496             | 0.79744                               |

**Table S3.** Distances between residue centers of interaction of hACE2 and D614G mutant spike after the 150 ns MD simulation.

| Residue of hACE2 | Residue of D614G mutant spike | Distance between residue centers (nm) |
|------------------|-------------------------------|---------------------------------------|
| Ser 19           | Tyr 449                       | 0.64492                               |
| Ser 19           | Gln 493                       | 1.02630                               |
| Ser 19           | Ser 494                       | 0.59786                               |
| Thr 20           | Gln 493                       | 0.87034                               |
| Thr 20           | Ser 494                       | 0.51190                               |
| Thr 20           | Tyr 495                       | 0.78766                               |
| Thr 20           | Gly 496                       | 0.66417                               |
| Ile 21           | Tyr 453                       | 0.75903                               |
| Ile 21           | Leu 455                       | 0.94519                               |
| Ile 21           | Gln 493                       | 0.72020                               |
| Gln 24           | Gln 493                       | 1.00141                               |
| Met 82           | Ala 475                       | 1.05171                               |
| Glu 87           | Lys 417                       | 0.87540                               |
| Ile 88           | Tyr 505                       | 1.09979                               |
| Gln 89           | Tyr 505                       | 0.97617                               |

**Table S4.** Hydrogen-bond occupancies of interacting residues between hACE2 and WT spike during the 150 ns MD simulation.

| Residue of hACE2 | Residue of WT spike | Hydrogen-bond occupancy |
|------------------|---------------------|-------------------------|
| Ser 19           | Gly 446             | 16.5%                   |
| Ser 19           | Gly 447             | 2.9%                    |
| Gln 24           | Gln 493             | 0.9%                    |
| Thr 78           | Thr 487             | 46.9%                   |
| Thr 78           | Thr 489             | 18.4%                   |
| Gln 81           | Tyr 489             | 12.0%                   |
| Gln 86           | Tyr 505             | 7.3%                    |
| Glu 87           | Arg 403             | 78.7%                   |
| Glu 87           | Gly 496             | 76.2%                   |
| Glu 87           | Gln 498             | 5.1%                    |
| Glu 87           | Tyr 505             | 1.7%                    |
| Gln 89           | Pro 499             | 1.3%                    |
| Gln 89           | Thr 500             | 9.9%                    |
| Gln 89           | Asn 501             | 36.5%                   |
| Gln 89           | Gly 502             | 43.6%                   |

**Table S5.** Hydrogen-bond occupancies of interacting residues between hACE2 and D614G mutant spike during the 150 ns MD simulation.

| Residue of hACE2 | Residue of D614G mutant | Hydrogen-bond occupancy |
|------------------|-------------------------|-------------------------|
| Ser 19           | Tyr 453                 | 22.3%                   |
| Ser 19           | Gln 493                 | 60.8%                   |
| Ser 19           | Ser 494                 | 37.7%                   |
| Glu 22           | Tyr 505                 | 33.1%                   |
| Glu 23           | Arg 403                 | 25.7%                   |
| Glu 23           | Gly 496                 | 37.7%                   |
| Gln 24           | Tyr 449                 | 2.5%                    |
| Gln 24           | Gln 493                 | 15.4%                   |
| Lys 26           | Thr 500                 | 5.1%                    |
| Lys 26           | Asn 501                 | 20.5%                   |
| Thr 27           | Gln 498                 | 18.1%                   |
| Asp 30           | Thr 500                 | 45.9%                   |
| Gln 86           | Arg 403                 | 3.5%                    |
| Glu 87           | Arg 403                 | 13.1%                   |
| Glu 87           | Lys 417                 | 22.2%                   |
| Gln 89           | Asp 405                 | 9.9%                    |
| Asn 90           | Thy 505                 | 6.4%                    |

**Table S6.** Standard deviations of RMSD of hACE2, the spikes and spike-hACE2 complexes, distances between the spikes and hACE2, number of hydrogen bonds and interaction energy, Van der Waal energy, electrostatic energy and total energy between hACE2 and the spikes for the last 25 ns of 150 ns simulations.

|                           |         | RMSD (nm) | Distance (nm) | Number of hydrogen bonds | Interaction energy (KJ/mol) | Van der Waal energy (KJ/mol) | Electrostatic energy (KJ/mol) | Total energy (KJ/mol) |
|---------------------------|---------|-----------|---------------|--------------------------|-----------------------------|------------------------------|-------------------------------|-----------------------|
| <b>WT spike</b>           | hACE2   | 0.026     |               |                          |                             |                              |                               |                       |
|                           | spike   | 0.025     | 0.0069        | 2.24                     | 143.95                      | 53.74                        | 190.52                        | 154.68                |
| <b>D614G mutant spike</b> | complex | 0.018     |               |                          |                             |                              |                               |                       |
|                           | hACE2   | 0.010     |               |                          |                             |                              |                               |                       |
|                           | spike   | 0.029     | 0.0092        | 1.65                     | 85.52                       | 18.45                        | 208.72                        | 211.38                |
|                           | complex | 0.049     |               |                          |                             |                              |                               |                       |
